# Supplementary material
Source: PubMed Central journal article supplement (PMC4136021)
Supplement: AAC.02857-14_zac008143071so1.pdf [file AAC.02857-14_zac008143071so1.pdf]

**Supplementary Materials for:**

**A structural analysis of base substitutions in *Thermus thermophilus* 16S ribosomal RNA conferring streptomycin resistance**

**Authors:** Hasan Demirci<sup>1</sup>, Frank V. Murphy IV<sup>2</sup>, Eileen L. Murphy<sup>1</sup>, Jacqueline L. Connetti<sup>1</sup>, Albert E. Dahlberg<sup>1</sup>, Gerwald Jogl<sup>1</sup> and Steven T. Gregory<sup>1,\*</sup>

<sup>1</sup>Department of Molecular Biology, Cell Biology and Biochemistry

Brown University

Providence, RI 02912 USA

<sup>2</sup>NE-CAT/Cornell University

Argonne, IL 60439 USA

\*Corresponding author

Phone: 1-401-863-3652

Fax: 1-401-863-1201

e-mail: [steven\\_gregory@brown.edu](mailto:steven_gregory@brown.edu)

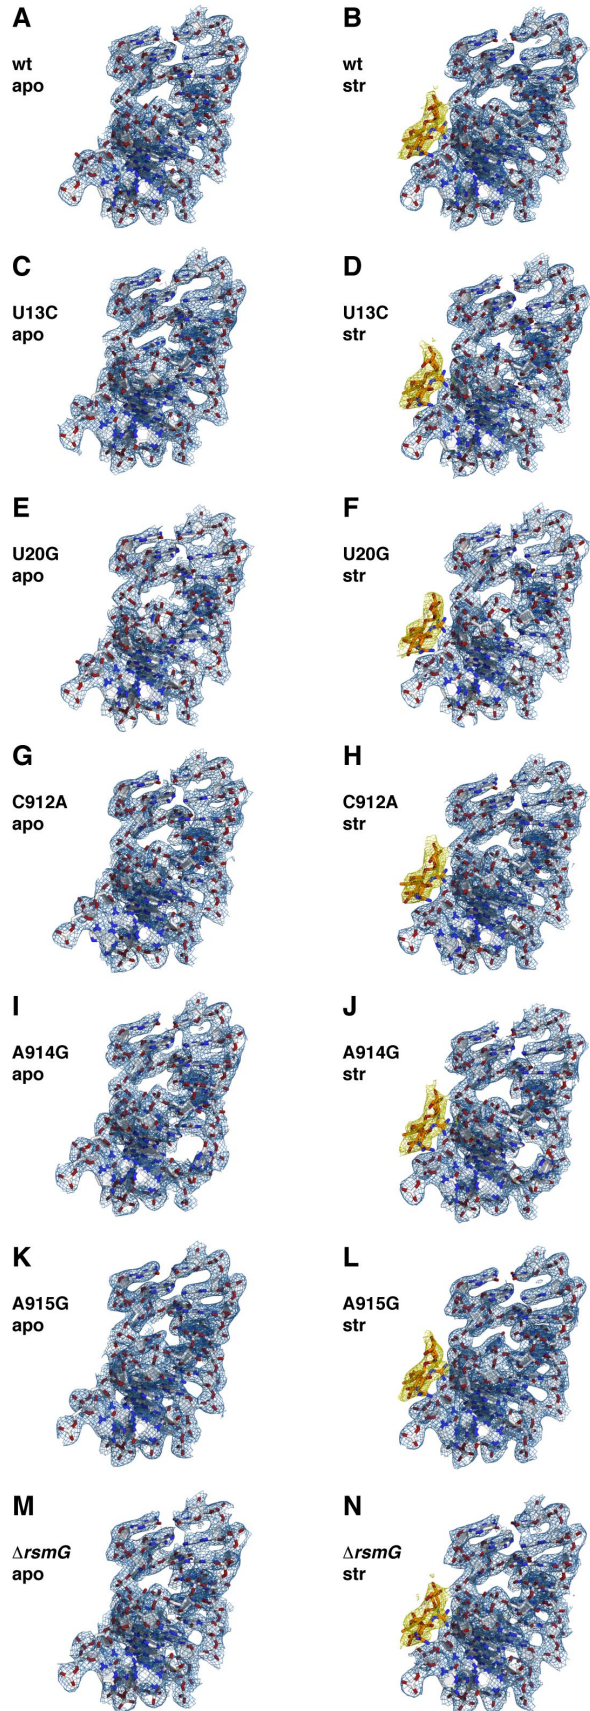

**FIG S1.** (previous page) Composite omit  $2mF_o - DF_c$  electron density maps of the central pseudoknot. Shown are composite omit maps of the central pseudoknot structures from the wild-type 30S subunit and each of the 30S subunit structures from streptomycin-resistant mutants. Included in these maps are 16S rRNA residues A10-U24, G885, and C912-U920. Streptomycin is shown as yellow sticks.

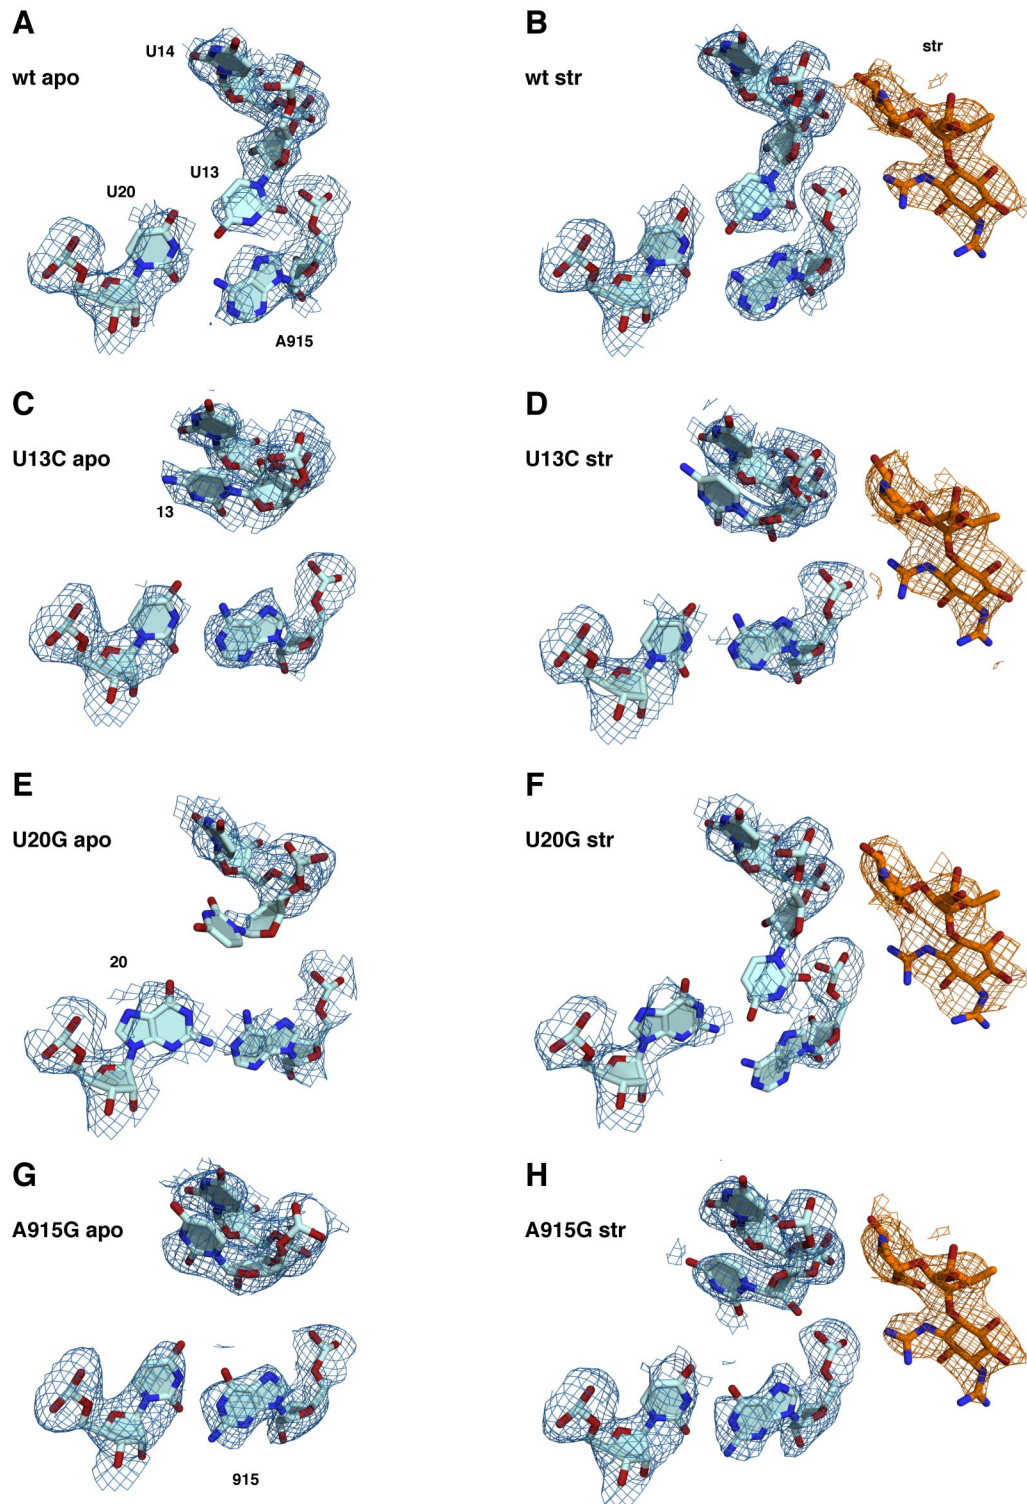

**FIG S2.** Composite omit  $2mF_o-DF_c$  electron density maps showing the secondary structure rearrangements in the U13C, U20G and A915G mutants.

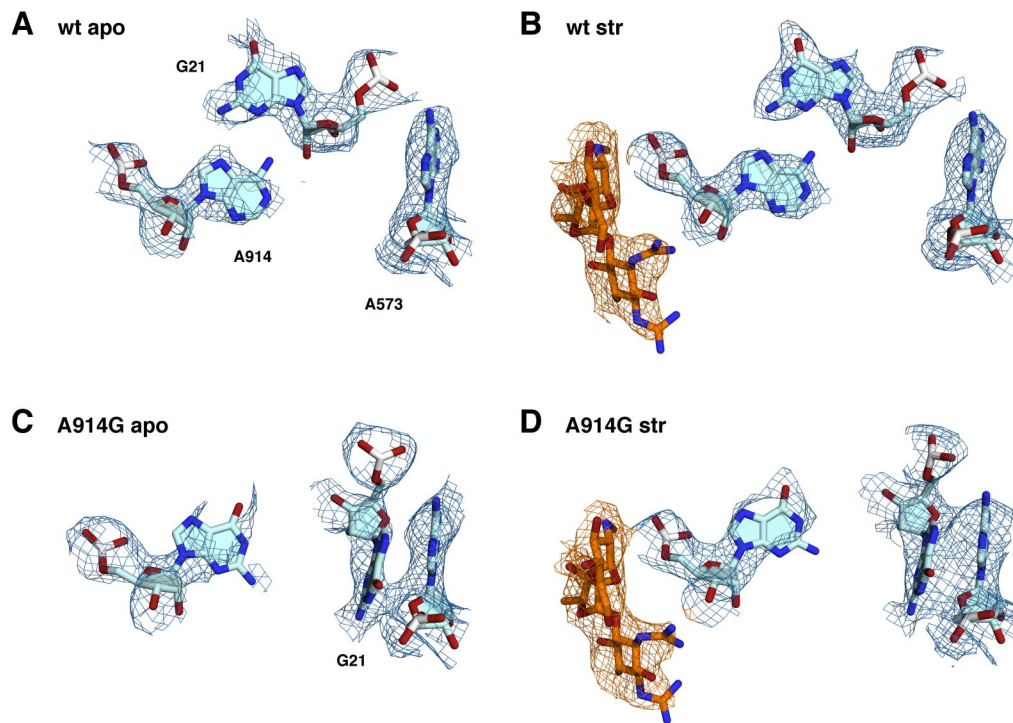

**FIG S3.** Composite omit  $2mF_o - DF_c$  electron density maps showing secondary structure rearrangements of the A914G mutant.

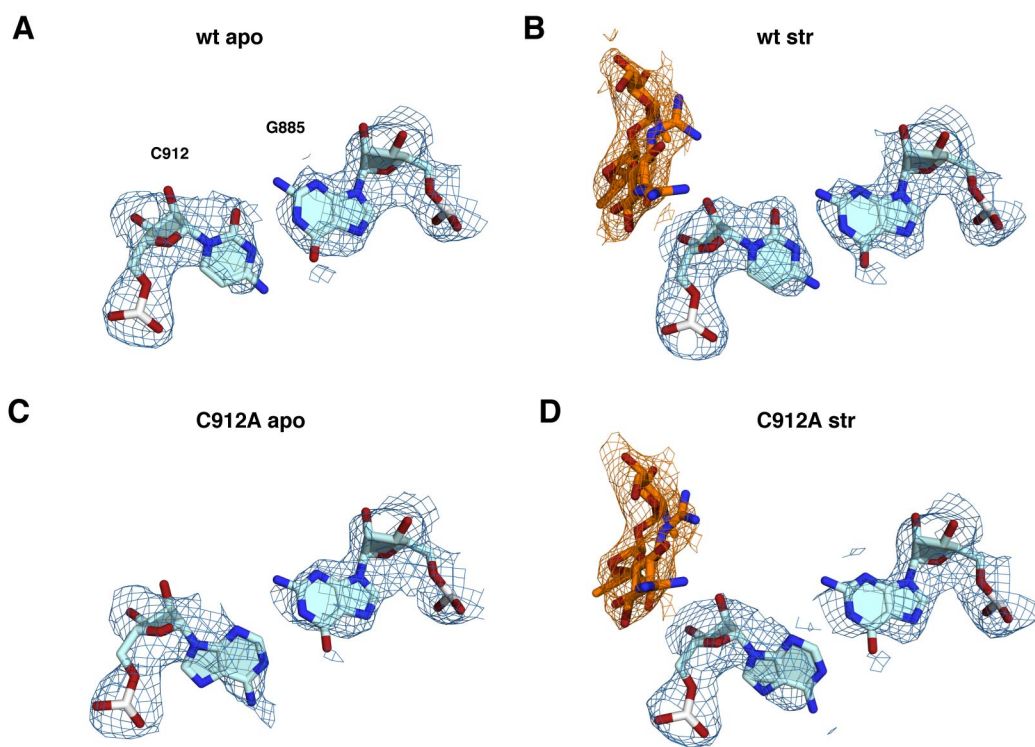

**FIG S4.** Composite omit  $2mF_o-DF_c$  electron density maps of the G885-C912 base pair and the effect of the C912A base substitution.

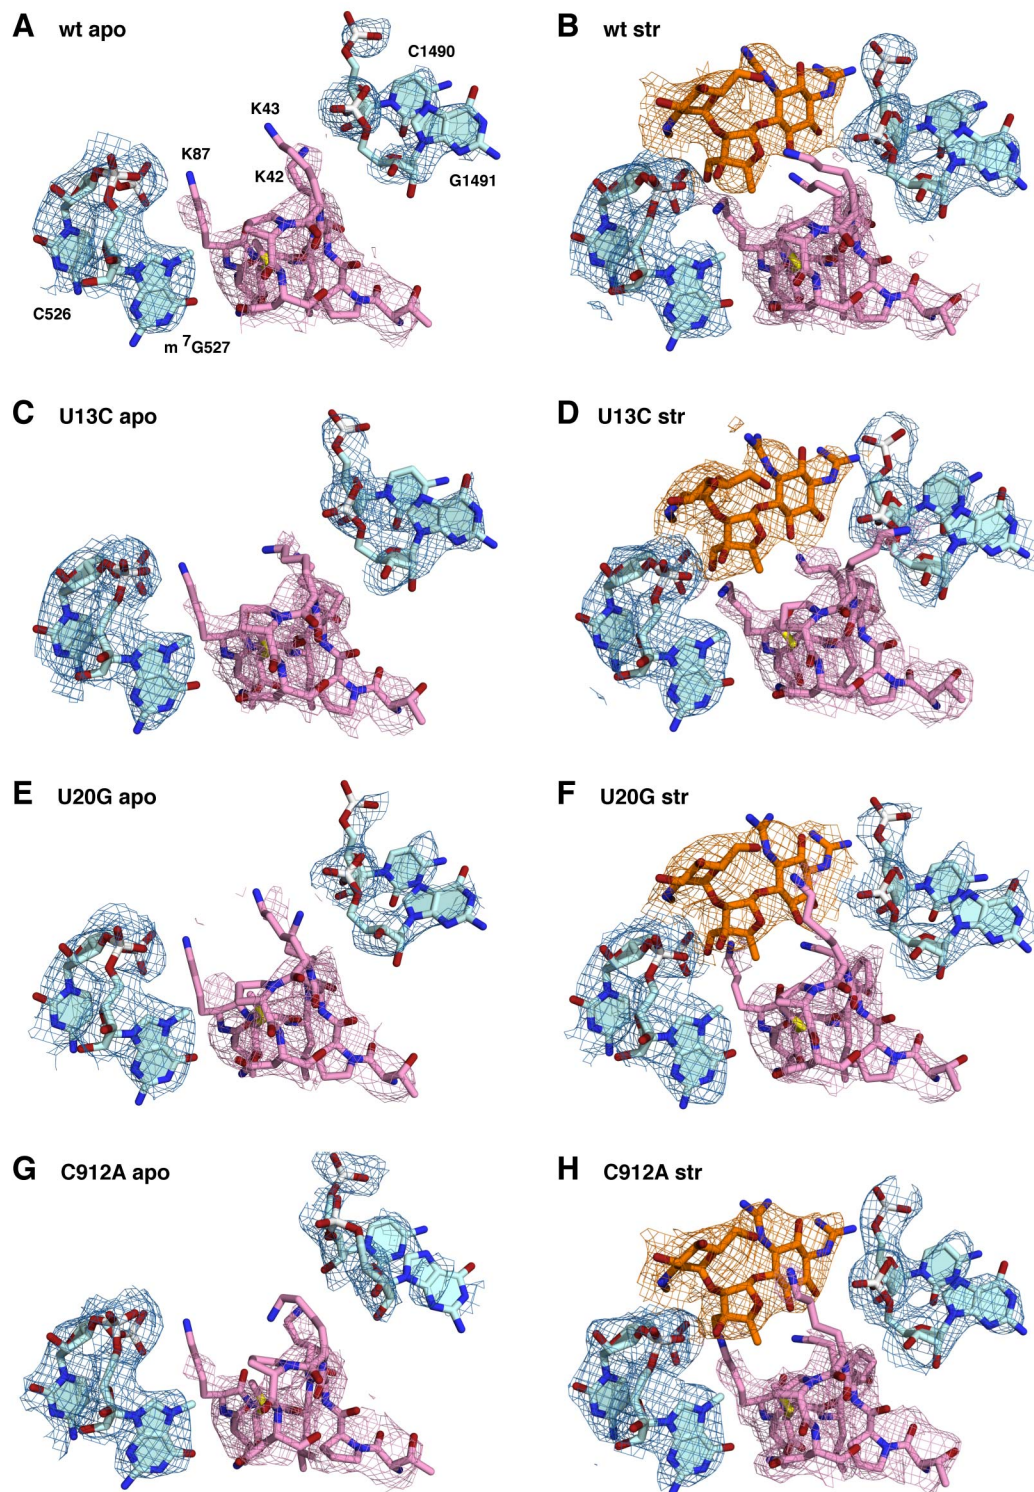

**FIG S5.** Composite omit  $2mF_o-DF_c$  electron density maps showing ribosomal protein S12 interactions with 16S rRNA and streptomycin. Ribosomal protein S12 is shown as pink sticks.

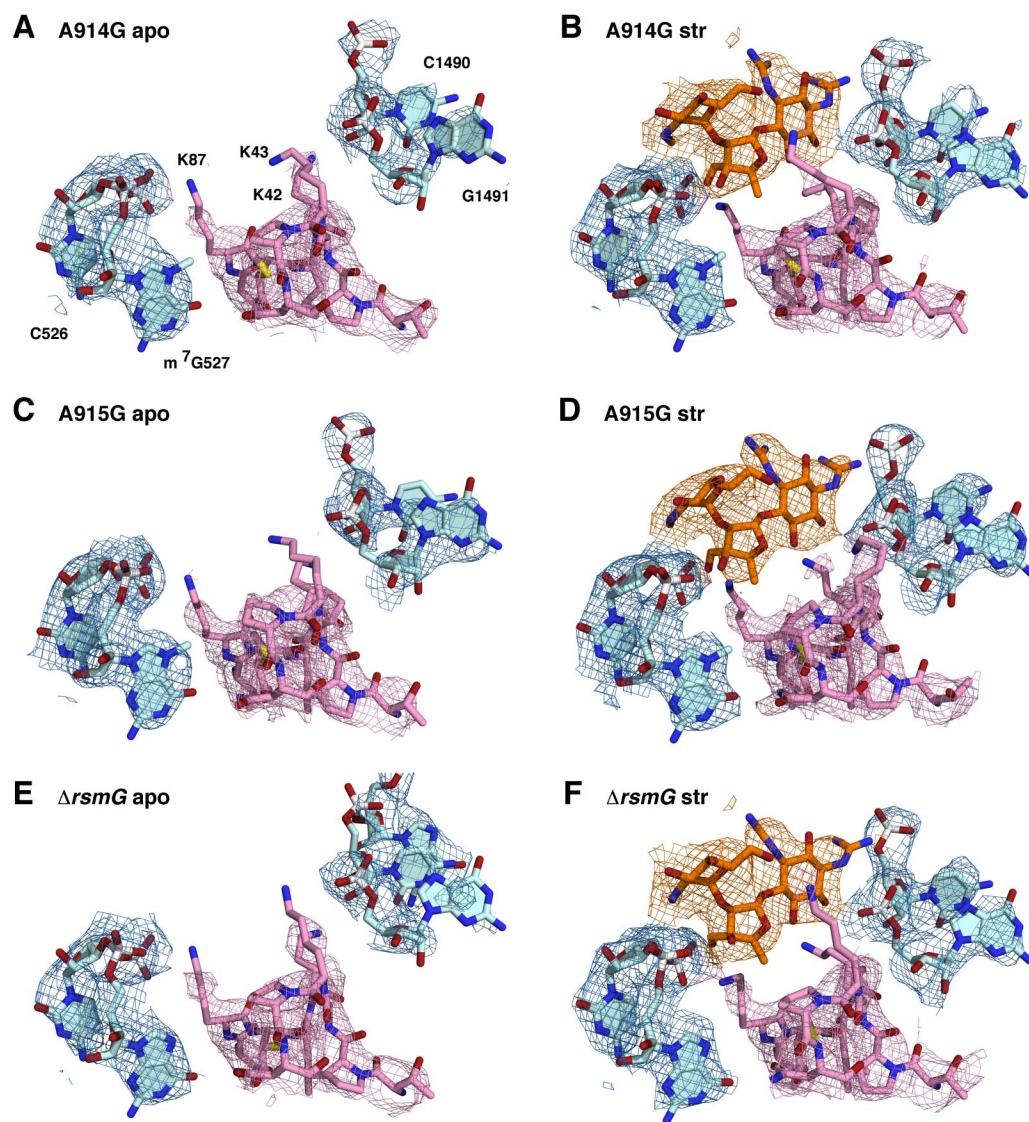

**FIG S6.** Composite omit  $2mF_o - DF_c$  electron density maps showing ribosomal protein S12 interactions with 16S rRNA and streptomycin (cont'd). Ribosomal protein S12 is shown as pink sticks.



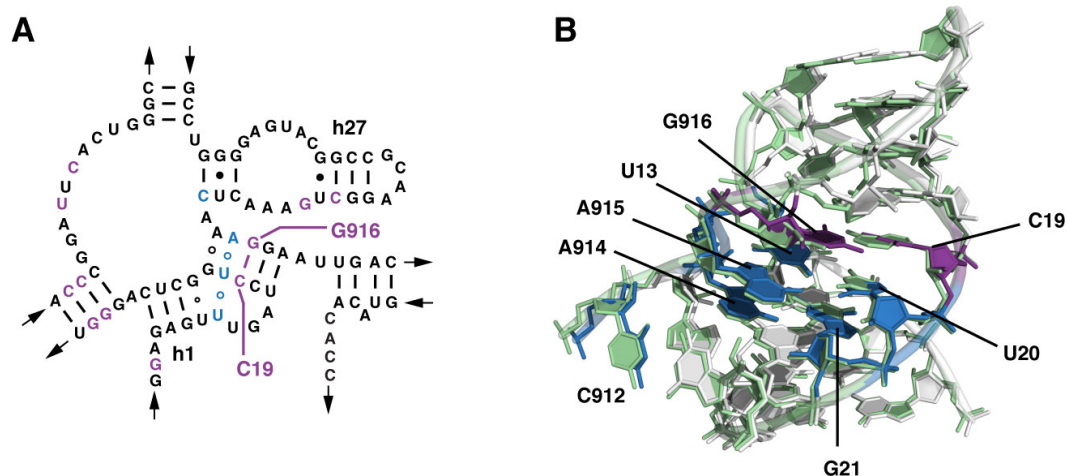

**FIG S7.** Comparison of the 16S rRNA central pseudoknot of *T. thermophilus* and *E. coli*. (A) Secondary structure model of the central pseudoknot of *T. thermophilus* 16S rRNA (modified from accession number M26923; ref. 1), with sites of Str<sup>r</sup> mutations in blue and residues differing between *T. thermophilus* and *E. coli* in purple. (B) Structure of the central pseudoknot in the 30S ribosomal subunit crystal structure of *T. thermophilus* (white, pdb entry 4DR1; ref 2) aligned with the 30S subunit in the *E. coli* 70S crystal structure (pale green, pdb entry 2AVY; ref 3). Structures were aligned with the alignment algorithm of PyMol (4) using 16S rRNA phosphate atoms of residues 1-925, with the default  $2\sigma$  rejection criterion and 50 iterative alignment cycles. Residues mutated in Str<sup>r</sup> ribosomes are shown in blue, and residues differing between *T. thermophilus* and *E. coli* are shown in purple.

**TABLE S1** Data collection and refinement statistics.

|                                                     | U13C apo                         | U13C str                         | U20G apo                         | U20G str                         |
|-----------------------------------------------------|----------------------------------|----------------------------------|----------------------------------|----------------------------------|
| PDB ID                                              | 4DUY                             | 4DUZ                             | 4DV0                             | 4DV1                             |
| <b>Data collection<sup>1</sup></b>                  |                                  |                                  |                                  |                                  |
| Beamline                                            | APS (ID-24-C)                    | APS (ID-24-C)                    | APS (ID-24-C)                    | APS (ID-24-C)                    |
| Space group                                         | P4 <sub>1</sub> 2 <sub>1</sub> 2 |
| Cell dimensions                                     |                                  |                                  |                                  |                                  |
| <i>a</i> , <i>b</i> , <i>c</i> (Å)                  | 402.5, 402.5, 175.9              | 402.5, 402.5, 174.0              | 402.1, 402.1, 174.0              | 403.5, 403.5, 173.4              |
| $\alpha$ , $\beta$ , $\gamma$ (°)                   | 90, 90, 90                       | 90, 90, 90                       | 90, 90, 90                       | 90, 90, 90                       |
| Resolution (Å) <sup>2</sup>                         | 35.0-3.4<br>(3.52-3.4)           | 35.0-3.65<br>(3.78-3.65)         | 35.0-3.85<br>(3.99-3.85)         | 35-3.85<br>(3.99-3.85)           |
| <i>R</i> <sub>merge</sub>                           | 0.064 (0.647)                    | 0.080 (0.519)                    | 0.07(0.817)                      | 0.075 (0.724)                    |
| <i>I</i> / $\sigma$ <i>I</i>                        | 14.17 (1.79)                     | 11.37 (1.69)                     | 14.77 (1.73)                     | 13.74 (1.70)                     |
| Completeness (%)                                    | 97.5 (98.2)                      | 95.8 (97.6)                      | 97.6 (99.5)                      | 97.3 (99.0)                      |
| Redundancy                                          | 3.1 (3.0)                        | 3.0 (2.8)                        | 3.2 (3.2)                        | 3.0 (3.0)                        |
| <b>Refinement</b>                                   |                                  |                                  |                                  |                                  |
| Resolution (Å)                                      | 35-3.4 (3.42-3.40)               | 35-3.65 (3.69-3.65)              | 35-3.85 (3.90-3.85)              | 35-3.85 (3.89-3.85)              |
| No. reflections                                     | 192822 (5152)                    | 150379 (4606)                    | 130643 (4098)                    | 130989 (4119)                    |
| <i>R</i> <sub>work</sub> / <i>R</i> <sub>free</sub> | 0.159/0.202<br>(0.289/0.316)     | 0.156/0.216<br>(0.268/0.330)     | 0.148/0.206<br>(0.273/0.299)     | 0.150/0.212<br>(0.269/0.308)     |
| No. atoms                                           |                                  |                                  |                                  |                                  |
| Protein                                             | 19090                            | 19090                            | 19090                            | 19090                            |
| RNA                                                 | 32644                            | 32507                            | 32647                            | 32510                            |
| Ligand/Ion/Water                                    | 850                              | 692                              | 716                              | 697                              |
| <i>B</i> -factors                                   |                                  |                                  |                                  |                                  |
| Protein                                             | 147.3                            | 178.3                            | 205.2                            | 208.2                            |
| RNA                                                 | 138.9                            | 169.7                            | 192.1                            | 194.2                            |
| Ligand/Ion/Water                                    | 139.5                            | 144.4                            | 175.2                            | 168.6                            |
| Coordinate errors                                   | 0.34                             | 0.30                             | 0.31                             | 0.33                             |
| R.m.s deviations                                    |                                  |                                  |                                  |                                  |
| Bond lengths (Å)                                    | 0.006                            | 0.014                            | 0.011                            | 0.012                            |
| Bond angles (°)                                     | 0.93                             | 1.70                             | 1.43                             | 1.52                             |
| Ramachandran plot                                   |                                  |                                  |                                  |                                  |
| Favored (%)                                         | 1836 (89.6)                      | 1788 (87.2)                      | 1800 (87.8)                      | 1754 (85.6)                      |
| Allowed (%)                                         | 190 (9.3)                        | 235 (11.5)                       | 228 (11.1)                       | 272 (13.3)                       |
| Generously allowed (%)                              | 23 (1.1)                         | 25 (1.2)                         | 22 (1.1)                         | 23 (1.1)                         |
| Disallowed (%)                                      | 1 (0.0)                          | 2 (0.1)                          | 0 (0.0)                          | 1 (0.0)                          |

<sup>1</sup>One crystal used for each dataset (two crystals used for A915G str dataset).

<sup>2</sup>Highest resolution shell is shown in parenthesis.

**TABLE S1** Data collection and refinement statistics (cont'd).

|                                                     | C912A apo                        | C912A str                        | A914G apo                        | A914G str                        |
|-----------------------------------------------------|----------------------------------|----------------------------------|----------------------------------|----------------------------------|
| PDB ID                                              | 4DV2                             | 4DV3                             | 4DV4                             | 4DV5                             |
| <b>Data collection<sup>1</sup></b>                  |                                  |                                  |                                  |                                  |
| Beamline                                            | APS (ID-24-C)                    | APS (ID-24-C)                    | APS (ID-24-C)                    | APS (ID-24-C)                    |
| Space group                                         | P4 <sub>1</sub> 2 <sub>1</sub> 2 |
| Cell dimensions                                     |                                  |                                  |                                  |                                  |
| <i>a</i> , <i>b</i> , <i>c</i> (Å)                  | 403.7, 403.7,<br>173.2           | 403.0, 403.0,<br>172.6           | 402.6, 402.6, 174.7              | 402.1, 402.1, 172.6              |
| $\alpha$ , $\beta$ , $\gamma$ (°)                   | 90, 90, 90                       | 90, 90, 90                       | 90, 90, 90                       | 90, 90, 90                       |
| Resolution (Å) <sup>2</sup>                         | 30.0-3.65<br>(3.78-3.65)         | 30.0-3.55<br>(3.68-3.55)         | 35.0-3.65<br>(3.78-3.65)         | 35-3.70<br>(3.83-3.70)           |
| <i>R</i> <sub>merge</sub>                           | 0.120 (0.759)                    | 0.156 (0.770)                    | 0.080(0.686)                     | 0.102 (0.608)                    |
| <i>I</i> / $\sigma$ <i>I</i>                        | 12.32 (1.80)                     | 10.79 (1.75)                     | 12.50 (1.65)                     | 9.18 (1.73)                      |
| Completeness (%)                                    | 97.2 (97.5)                      | 96.6 (90.9)                      | 98.3 (99.5)                      | 98.3 (98.5)                      |
| Redundancy                                          | 3.1 (3.1)                        | 2.8 (2.6)                        | 3.2 (3.2)                        | 2.9 (2.7)                        |
| <b>Refinement</b>                                   |                                  |                                  |                                  |                                  |
| Resolution (Å)                                      | 30-3.65 (3.69-<br>3.65)          | 30-3.55 (3.59-<br>3.55)          | 35-3.65 (3.69-3.65)              | 35-3.70 (3.73-3.70)              |
| No. reflections                                     | 153299 (4479)                    | 164335 (4746)                    | 155190 (4708)                    | 148962 (4453)                    |
| <i>R</i> <sub>work</sub> / <i>R</i> <sub>free</sub> | 0.165/0.223<br>(0.299/0.336)     | 0.166/0.220<br>(0.280/0.329)     | 0.153/0.208<br>(0.291/0.348)     | 0.159/0.212<br>(0.274/0.328)     |
| No. atoms                                           |                                  |                                  |                                  |                                  |
| Protein                                             | 19090                            | 19090                            | 19090                            | 19090                            |
| RNA                                                 | 32646                            | 32509                            | 32645                            | 32508                            |
| Ligand/Ion/Water                                    | 705                              | 703                              | 699                              | 702                              |
| <i>B</i> -factors                                   |                                  |                                  |                                  |                                  |
| Protein                                             | 177.9                            | 157.3                            | 173.9                            | 153.5                            |
| RNA                                                 | 172.2                            | 150.3                            | 166.2                            | 146.3                            |
| Ligand/Ion/Water                                    | 146.5                            | 127.6                            | 148.8                            | 124.4                            |
| Coordinate errors                                   | 0.35                             | 0.30                             | 0.28                             | 0.33                             |
| R.m.s deviations                                    |                                  |                                  |                                  |                                  |
| Bond lengths (Å)                                    | 0.013                            | 0.013                            | 0.013                            | 0.015                            |
| Bond angles (°)                                     | 1.59                             | 1.60                             | 1.62                             | 1.82                             |
| Ramachandran plot                                   |                                  |                                  |                                  |                                  |
| Favored (%)                                         | 1791 (87.4)                      | 1793 (87.5)                      | 1773 (86.5)                      | 1777 (86.7)                      |
| Allowed (%)                                         | 235 (11.5)                       | 225 (11.0)                       | 257 (12.5)                       | 248 (12.1)                       |
| Generously allowed (%)                              | 22 (1.1)                         | 30 (1.5)                         | 18 (0.9)                         | 24 (1.2)                         |
| Disallowed (%)                                      | 2 (0.1)                          | 2 (0.1)                          | 2 (0.1)                          | 1 (0.0)                          |

<sup>1</sup>One crystal used for each dataset (two crystals used for A915G str dataset).

<sup>2</sup>Highest resolution shell is shown in parenthesis.

**TABLE S1** Data collection and refinement statistics (cont'd).

|                                                     | A915G apo                        | A915G str                        | $\Delta rsmG$ apo                | $\Delta rsmG$ str                |
|-----------------------------------------------------|----------------------------------|----------------------------------|----------------------------------|----------------------------------|
| PDB ID                                              | 4DV6                             | 4DV7                             | 4NXM                             | 4NXN                             |
| <b>Data collection<sup>1</sup></b>                  |                                  |                                  |                                  |                                  |
| Beamline                                            | APS (ID-24-C)                    | APS (ID-24-C)                    | APS (ID-24-C)                    | APS (ID-24-C)                    |
| Space group                                         | P4 <sub>1</sub> 2 <sub>1</sub> 2 |
| Cell dimensions                                     |                                  |                                  |                                  |                                  |
| <i>a</i> , <i>b</i> , <i>c</i> (Å)                  | 401.3, 401.3,<br>176.0           | 403.4, 403.4, 173.6              | 402.9, 402.9, 174.3              | 403.1, 403.1, 173.5              |
| $\alpha$ , $\beta$ , $\gamma$ (°)                   | 90, 90, 90                       | 90, 90, 90                       | 90, 90, 90                       | 90, 90, 90                       |
| Resolution (Å) <sup>2</sup>                         | 35.0-3.3<br>(3.42-3.30)          | 35.0-3.3<br>(3.42-3.30)          | 35.0-3.65<br>(3.78-3.65)         | 35.0-3.55<br>(3.68-3.55)         |
| <i>R</i> <sub>merge</sub>                           | 0.097 (0.731)                    | 0.126 (0.950)                    | 0.081 (0.738)                    | 0.092 (0.691)                    |
| <i>I</i> / $\sigma$ <i>I</i>                        | 12.73 (1.69)                     | 13.43 (1.78)                     | 15.50 (1.74)                     | 11.42 (1.76)                     |
| Completeness (%)                                    | 98.9 (99.3)                      | 98.8 (99.9)                      | 98.5 (98.8)                      | 99.2 (99.1)                      |
| Redundancy                                          | 3.8 (3.8)                        | 4.8 (4.6)                        | 3.7 (3.6)                        | 3.3 (3.3)                        |
| <b>Refinement</b>                                   |                                  |                                  |                                  |                                  |
| Resolution (Å)                                      | 35-3.3 (3.33-<br>3.30)           | 35-3.3 (3.33-3.30)               | 35-3.65 (3.69-3.65)              | 35-3.55 (3.58-3.55)              |
| No. reflections                                     | 210495 (5518)                    | 210877 (6240)                    | 155250 (4508)                    | 170277 (5219)                    |
| <i>R</i> <sub>work</sub> / <i>R</i> <sub>free</sub> | 0.163/0.208<br>(0.290/0.330)     | 0.168/0.210<br>(0.307/0.356)     | 0.180/0.226<br>(0.304/0.359)     | 0.193/0.231<br>(0.314/0.357)     |
| No. atoms                                           |                                  |                                  |                                  |                                  |
| Protein                                             | 19090                            | 19090                            | 19090                            | 19090                            |
| RNA                                                 | 32645                            | 32508                            | 32643                            | 32506                            |
| Ligand/Ion/Water                                    | 888                              | 739                              | 461                              | 541                              |
| <i>B</i> -factors                                   |                                  |                                  |                                  |                                  |
| Protein                                             | 136.7                            | 168.6                            | 149.7                            | 153.1                            |
| RNA                                                 | 128.7                            | 157.3                            | 145.2                            | 145.8                            |
| Ligand/Ion/Water                                    | 130.8                            | 144.4                            | 99.1                             | 103.1                            |
| Coordinate errors                                   | 0.31                             | 0.29                             | 0.37                             | 0.37                             |
| R.m.s deviations                                    |                                  |                                  |                                  |                                  |
| Bond lengths (Å)                                    | 0.006                            | 0.007                            | 0.008                            | 0.005                            |
| Bond angles (°)                                     | 0.98                             | 1.02                             | 0.83                             | 0.76                             |
| Ramachandran plot                                   |                                  |                                  |                                  |                                  |
| Favored (%)                                         | 1845 (90.0)                      | 1817 (88.6)                      | 1819 (88.7)                      | 1821 (88.8)                      |
| Allowed (%)                                         | 178 (8.7)                        | 209 (10.2)                       | 209 (10.2)                       | 209 (10.2)                       |
| Generously allowed (%)                              | 25 (1.2)                         | 24 (1.2)                         | 21 (1.0)                         | 20 (1.0)                         |
| Disallowed (%)                                      | 2 (0.1)                          | 0 (0.0)                          | 1 (0.0)                          | 0 (0.0)                          |

<sup>1</sup>One crystal used for each dataset (two crystals used for A915G str dataset).

<sup>2</sup>Highest resolution shell is shown in parenthesis.

## REFERENCES

1. **Cannone JJ, Subramanian S, Schnare MN, Collett JR, D'Souza LM, Du Y, Feng B, Lin N, Madabusi LV, Müller KM, Pande N, Shang Z, Yu N, Gutell RR.** 2002. The comparative RNA web (CRW) site: an online database of comparative sequence and structure information for ribosomal, intron, and other RNAs. *BMC Bioinformatics* **3**:2.
2. **Demirci H, Murphy IV F, Murphy E, Gregory ST, Dahlberg AE, Jogle G.** 2013. A structural basis for streptomycin-induced misreading of the genetic code. *Nat. Commun.* **4**:1355.
3. **Schuwirth BS, Borovinskaya MA, Hau CW, Zhang W, Vila-Sanjurjo A, Holton JM, Cate JHD.** 2005. Structures of the bacterial ribosome at 3.5 Å resolution. *Science* **310**:827-834.
4. **Schroedinger L.** 2012. The PyMOL Molecular Graphics System, Version 1.5.
